# Supplementary material for: Mechanism of the Antigen-Independent Cytokinergic SPE-7 IgE Activation of Human Mast Cells in Vitro
Source: PubMed Central journal article supplement (PMC4402612; doi:10.1038/srep09538), 2015-04-20
Supplement: srep09538-s1.pdf [file srep09538-s1.pdf]

**Mechanism of the Antigen-Independent Cytokinergic SPE-7 IgE Activation of Human Mast Cells *in Vitro***

Heather J Bax, Holly Bowen, Tihomir S Dodev, Brian J Sutton, Hannah J Gould

**Supplementary Information:**

Supplementary Table – Primers

Supplementary Figure 1 – SPE-7 IgE Fab Amino Acid Sequence

Supplementary Figure 2 – SPE-7 IgE Fab Cloning, Expression and Purification

### Supplementary Table - Primers

Where primers were used to add a His-Tag or homologous ends, these regions are underlined.

| Primer                                                                                      | Sequence                                          |
|---------------------------------------------------------------------------------------------|---------------------------------------------------|
| <i><b>SPE-7 IgE Heavy and light chain amplification from NS1 hybridoma cells</b></i>        |                                                   |
| SPE-7_L_F                                                                                   | CAGGCTGTTGTGACTCAGGAATC                           |
| SPE-7_L_R                                                                                   | CTAGGAACAGTCAGCACGGGA                             |
| SPE-7_H_F                                                                                   | GAGGTGCAGCTGCAGCAG                                |
| SPE-7_H_R                                                                                   | CTAGGAGGGACGGAGGGAG                               |
| <hr/>                                                                                       |                                                   |
| <i><b>SPE-7 IgE Fab heavy chain amplification and His-Tag addition for PIPE cloning</b></i> |                                                   |
| Fab_H_R1_F                                                                                  | GCGAATTCGCCACCATGGACT                             |
| Fab_H_R1_R                                                                                  | <u>CTAGTGATGGTGATGGTGATGGACAGGTCGAACTAGGAT</u>    |
| Fab_H_R2_F                                                                                  | <u>CGCTAATTCAAAGCAAATGGACTGGACCTGGAGGATCCTC</u>   |
| Fab_H_R2_R                                                                                  | <u>ATGTCTGGCCAGCTAGCTAGTGATGGTGATGGTGATGGAC</u>   |
| <hr/>                                                                                       |                                                   |
| <i><b>SPE-7 IgE Light chain amplification for PIPE cloning</b></i>                          |                                                   |
| BspEI_L_F                                                                                   | <u>GCTAATTCAAAGCAAATATGTTGCCATCACA</u> ACTCATTGGG |
| AvrII_L_R                                                                                   | GGAAACCTGCTCCTAGCTAGACTAGGAACAGTCAGCACGG          |

***SPE-7 IgE Fab Heavy Chain***

←  
EVQLQQPGAE LVKPGASVKL SCKASGYTFT SYWMHWVKQR PGRGLEWIGR  
\_\_\_\_\_  
SPE-7 VH \_\_\_\_\_  
IDPNGGGTKY NEKFKSKATL TVDKPSSTAY MQLSSLTSED SAVYYCARMW  
\_\_\_\_\_  
YYGTYFDYW GQGTTLVSS ASIRNPQLYP LKPKGTASM TLGCLVKDYF  
\_\_\_\_\_  
Murine Cε1 \_\_\_\_\_  
PGPVTVTWYS DSLNMSTVNF PALGSELKVT TSQVTSWGKS AKNFTCHVTH  
\_\_\_\_\_  
PPSFNESRTI LVRPV  
→

***SPE-7 IgE Fab Light Chain***

←  
QAVVTQESAL TTSPGETVTL TCRSSTGAVT TSNYANWVQE KPDHLFTGLI  
\_\_\_\_\_  
SPE-7 VL \_\_\_\_\_  
GGTNNRAPGV PARFSGSLIG DKAALTITGA QTEDEAIYFC ALWYSNHLVF  
\_\_\_\_\_  
GGGTKLTVLG QPKSSPSVTL FPPSSEELET NKATLVCTIT DFYPGVVTVD  
\_\_\_\_\_  
Murine Cλ \_\_\_\_\_  
WKVDGTPVTQ GMETTQPSKQ SNNKYMSSY LTLTAGAWER HNSYSCQVTH  
\_\_\_\_\_  
EGHTVEKSLS RADCS  
→

**Supplementary Figure 1– SPE-7 IgE Fab Amino Acid Sequence**  
SPE-7 IgE Fab heavy and light chain amino acid sequences (GenBank Accession Nos. KJ734989 and KJ734990), derived from NS1 hybridoma cells, and cloned and expressed as SPE-7 IgE Fab protein.

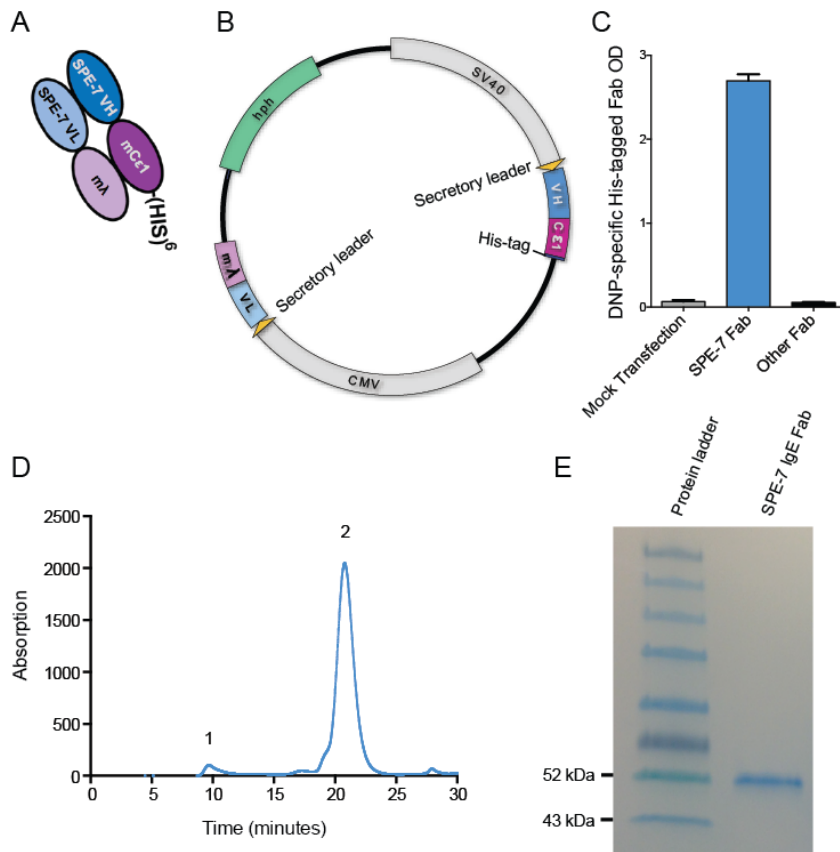

### Supplementary Figure 2 – SPE-7 IgE Fab Cloning, Expression and Purification

Schematic of the SPE-7 IgE Fab construct (A) and pVITRO1 vector containing IgE Fab heavy chain (VH and Cε1) and light chain (VL and CL) used to transfect HEK293F cells for mammalian expression (B). Anti-his-tag ELISA to measure expression of DNP-specific SPE-7 IgE Fab by HEK293F cells (C). Size-exclusion chromatography purification profile (D). Monomeric IgE Fab was eluted at around 20 minutes (2) and these fractions collected to remove aggregated protein (1). SDS-PAGE analysis of SPE-7 IgE Fab protein under non-reducing conditions (E).
